# Supplementary material
Source: Springer Nature journal article supplement (https://www.springermedizin.de/resource/supplementary/12960_2003_3_MOESM3_ESM.pdf/9569764)
Supplement: MOESM3 [file 9569764]

**Level****Distribution****Efficiency*****Health services provision***

- Stock of HRH
- Skills mix
- Migration
- Labour force activity
- Institutional sector
- Earnings

- Distribution of HRH by location / gender / other
- Gender gap in earnings

- Provider productivity

***Resources generation***

- Renewal and loss of HRH
- Education and training

- Distribution of entrants by location / gender / other

- Training costs
